# Supplementary material for: Common risk variants for epilepsy are enriched in families previously targeted for rare monogenic variant discovery
Source: PubMed Central journal article supplement — eBioMedicine. 2022 May 27;81:104079. doi: 10.1016/j.ebiom.2022.104079 (PMC9156876; doi:10.1016/j.ebiom.2022.104079), 2022-05-27

## Supplementary Data

### Common risk variants for epilepsy are enriched in families previously targeted for rare monogenic variant discovery

Karen L Oliver,\* Colin A Ellis,\* Ingrid E Scheffer, Shiva Ganesan, Costin Leu, Lynette G Sadleir, Erin L Heinzen, Heather C Mefford, Andrew J Bass, Sarah W Curtis, Rebekah V Harris, Epi4K Consortium, David C Whiteman, Ingo Helbig, Ruth Ottman, Michael P Epstein, Melanie Bahlo,# Samuel F Berkovic#

\*contributed equally

#contributed equally

#### Table of Contents

|                                                                                                                          |    |
|--------------------------------------------------------------------------------------------------------------------------|----|
| <i>Epi4K Consortium collaborators</i> .....                                                                              | 2  |
| <i>Supplementary Table 1. Summary of original samples by cohort origin and SNP array</i> .....                           | 4  |
| <i>Supplementary Table 2. Demographics of final study cohorts under comparison</i> .....                                 | 5  |
| <i>Supplementary Table 3. Detailed phenotypes of epilepsy cases</i> .....                                                | 6  |
| <i>Supplementary Table 4. Deciles of polygenic risk</i> .....                                                            | 7  |
| <i>Supplementary Table 5. Varying model thresholds</i> .....                                                             | 8  |
| <i>Supplementary Table 6. Negative control, Asthma PRS</i> .....                                                         | 9  |
| <i>Supplementary Table 7. PRS Models stratified by epilepsy phenotype</i> .....                                          | 10 |
| <i>Supplementary Table 8. Epilepsy types among rare variant carriers, familial cases</i> .....                           | 11 |
| <i>Supplementary Table 9. PRS in cases carrying rare epilepsy variants</i> .....                                         | 12 |
| <i>Supplementary Figure 1. SNP concordance across four Illumina array types</i> .....                                    | 13 |
| <i>Supplementary Figure 2. Quality control and SNP imputation workflow</i> .....                                         | 14 |
| <i>Supplementary Figure 3. Ancestry principal components plot for our Case:Control cohort against 1000 Genomes</i> ..... | 15 |
| <i>Supplementary Figure 4. Reason for sample exclusions stratified by Case:Control status</i> .....                      | 16 |
| <i>Supplementary Figure 5. Distribution of affected individuals genotyped per family</i> .....                           | 17 |
| <i>Supplementary Figure 6. Epilepsy PRS in multiplex families</i> .....                                                  | 18 |
| <i>Supplementary Figure 7. PRS in sporadic cases carrying rare variants</i> .....                                        | 19 |

## Epi4K Consortium collaborators

| <b>Name</b>                   | <b>Affiliation</b>                                                                                                                                                                                                                                                                                                                                           |
|-------------------------------|--------------------------------------------------------------------------------------------------------------------------------------------------------------------------------------------------------------------------------------------------------------------------------------------------------------------------------------------------------------|
| <b>Zaid Afawi</b>             | Sackler School of Medicine, Tel Aviv University, Ramat Aviv, Israel.                                                                                                                                                                                                                                                                                         |
| <b>Brian K. Alldredge</b>     | Department of Clinical Pharmacy, UCSF School of Pharmacy, Department of Neurology, UCSF School of Medicine 94143 USA.                                                                                                                                                                                                                                        |
| <b>Dina Amrom</b>             | Departments of Neurology, Neurosurgery and Human Genetics, McGill University, Montreal, Quebec H3A 2B4 Canada.                                                                                                                                                                                                                                               |
| <b>Eva Andermann</b>          | Departments of Neurology, Neurosurgery and Human Genetics, McGill University, Montreal, Quebec H3A 2B4 Canada.                                                                                                                                                                                                                                               |
| <b>Jocelyn F. Bautista</b>    | Department of Neurology, Cleveland Clinic Lerner College of Medicine, Epilepsy Center of the Cleveland Clinic Neurological Institute, Cleveland, Ohio 44195 USA.                                                                                                                                                                                             |
| <b>Susannah T. Bellows</b>    | Epilepsy Research Centre, Department of Medicine, University of Melbourne (Austin Health), Heidelberg, Victoria 3084, Australia.                                                                                                                                                                                                                             |
| <b>Judith Bluvstein</b>       | New York University Langone Comprehensive Epilepsy Center, New York, NY, USA                                                                                                                                                                                                                                                                                 |
| <b>Joshua S. Bridgers</b>     | Institute for Genomic Medicine, Columbia University Medical Center, New York, NY, USA.                                                                                                                                                                                                                                                                       |
| <b>Rosemary Burgess</b>       | Epilepsy Research Centre, Department of Medicine, University of Melbourne (Austin Health), Heidelberg, Victoria 3084, Australia.                                                                                                                                                                                                                             |
| <b>Gregory D. Cascino</b>     | Division of Epilepsy, Mayo Clinic, Rochester, Minnesota 55905 USA.                                                                                                                                                                                                                                                                                           |
| <b>Seo-Kyung Chung</b>        | Neurology and Molecular Neuroscience Research, Institute of Life Science, Swansea University Medical School, Swansea University, Swansea SA2 8PP, UK; Kids Neuroscience Centre, Kids Research, Children Hospital at Westmead, Sydney, NSW 2145, Australia; Brain and Mind Centre, Faculty of Medicine and Health, University of Sydney, NSW 2050, Australia. |
| <b>Patrick Cossette</b>       | Centre of Excellence in Neuromics and CHUM Research Center, Université de Montréal, CHUM-Hôpital, Notre-Dame Montréal, Quebec H2L 4M1, Canada.                                                                                                                                                                                                               |
| <b>Francesca Darra</b>        | Unit of Child Neuropsychiatry, University of Verona, Italy.                                                                                                                                                                                                                                                                                                  |
| <b>Norman Delanty</b>         | Department of Neurology, Beaumont Hospital, and FutureNeuro Research Centre, Royal College of Surgeons in Ireland, Dublin 9, Ireland.                                                                                                                                                                                                                        |
| <b>Orrin Devinsky</b>         | NYU Comprehensive Epilepsy Center, New York University, Department of Neurology, NYU School of Medicine, New York, New York 10016, USA.                                                                                                                                                                                                                      |
| <b>Dennis Dlugos</b>          | Department of Neurology and Pediatrics, The Children's Hospital of Philadelphia, Perelman School of Medicine at the University of Pennsylvania, Philadelphia, Pennsylvania 19104, USA.                                                                                                                                                                       |
| <b>Jacqueline French</b>      | NYU Comprehensive Epilepsy Center, NYU Grossman School of Medicine, New York, New York 10016 USA.                                                                                                                                                                                                                                                            |
| <b>Catharine Freyer</b>       | Department of Neurology, University of California, San Francisco, San Francisco, California 94143 USA.                                                                                                                                                                                                                                                       |
| <b>Daniel Friedman</b>        | Department of Neurology, NYU School of Medicine, New York, New York, 10016 USA.                                                                                                                                                                                                                                                                              |
| <b>Hadassa Goldberg-Stern</b> | Epilepsy Unit, Schneider Children's Medical Center of Israel, Petach Tikvah, Israel.                                                                                                                                                                                                                                                                         |
| <b>Micheline Gravel</b>       | Centre of Excellence in Neuromics and CHUM Research Center, Université de Montréal, Quebec, H2X 0A9, Canada.                                                                                                                                                                                                                                                 |
| <b>Olivia J. Henry</b>        | Centre for Inherited Metabolic Diseases, Karolinska University Hospital, Stockholm, Sweden; Department of Molecular Medicine and Surgery, Karolinska Institutet, Stockholm, Sweden.                                                                                                                                                                          |
| <b>Katherine B. Howell</b>    | Department of Neurology, Royal Children's Hospital, Melbourne, Vic, Australia; Department of Paediatrics, University of Melbourne, Melbourne, Vic, Australia; Murdoch Children's Research Institute, Melbourne, Vic, Australia.                                                                                                                              |
| <b>Heidi E. Kirsch</b>        | Department of Neurology, University of California, San Francisco, San Francisco, California 94143 USA.                                                                                                                                                                                                                                                       |
| <b>Robert C. Knowlton</b>     | Department of Neurology, University of California, San Francisco, San Francisco, California 94143 USA.                                                                                                                                                                                                                                                       |
| <b>Amos Korczyn</b>           | Sackler School of Medicine, Tel Aviv University, Ramat Aviv, Israel.                                                                                                                                                                                                                                                                                         |

|                                 |                                                                                                                                                                                                                                       |
|---------------------------------|---------------------------------------------------------------------------------------------------------------------------------------------------------------------------------------------------------------------------------------|
| <b>Eric Kossoff</b>             | Department of Neurology, Johns Hopkins Hospital, Baltimore, Maryland 21287 USA.                                                                                                                                                       |
| <b>Richard J. Leventer</b>      | Department of Neurology Royal Children's Hospital, Murdoch Children's Research Institute and University of Melbourne Department of Pediatrics, Parkville, VIC, Australia.                                                             |
| <b>Paul J. Lockhart</b>         | Bruce Lefroy Centre for Genetic Health Research, Murdoch Childrens Research Institute, Royal Children's Hospital, Parkville, Victoria, Australia; Department of Paediatrics, University of Melbourne, Parkville, Victoria, Australia. |
| <b>Rebecca Loeb</b>             | G. H. Sergievsky Center, Columbia University, New York, NY 10032, USA.                                                                                                                                                                |
| <b>Daniel H. Lowenstein</b>     | Department of Neurology, University of California, San Francisco, San Francisco, California 94143 USA.                                                                                                                                |
| <b>Yi-Fan Lu</b>                | Biology Department, Westmont College, Santa Barbara, California, 93108, USA.                                                                                                                                                          |
| <b>Anthony G. Marson</b>        | Department of Pharmacology and Therapeutics, University of Liverpool, Clinical Sciences Centre, Lower Lane, Liverpool L9 7LJ, UK.                                                                                                     |
| <b>Caroline Mebane</b>          | Institute for Genomic Medicine, Columbia University Medical Center, New York, NY, USA.                                                                                                                                                |
| <b>Paul V. Motika</b>           | Comprehensive Epilepsy Center, Oregon Health and Science University, Portland, OR 97239 USA.                                                                                                                                          |
| <b>Terence J. O'Brien</b>       | Department of Neuroscience, Central Clinical School, Alfred Health, Monash University, Melbourne, Victoria, AUSTRALIA.                                                                                                                |
| <b>Juliann M. Paolicchi</b>     | Department of Neurology and Pediatrics, Zucker Hofstra School of Medicine, SIUH and Lenox-Hill Hospital, New York, NY 10075, USA.                                                                                                     |
| <b>Jack M. Parent</b>           | Department of Neurology and Michigan Neuroscience Institute, Michigan Medicine, Ann Arbor, and Ann Arbor Veterans Administration Healthcare System, Ann Arbor, Michigan, USA.                                                         |
| <b>Kristen L. Park</b>          | University of Colorado School of Medicine, Aurora CO 80045 USA.                                                                                                                                                                       |
| <b>Sarah J. Paterson</b>        | Department of Paediatrics and Child Health, University of Otago, Wellington, New Zealand.                                                                                                                                             |
| <b>Slave Petrovski</b>          | Epilepsy Research Centre, Department of Medicine, University of Melbourne (Austin Health), Heidelberg, Victoria 3084, Australia.                                                                                                      |
| <b>William O. Pickrell</b>      | Wales Epilepsy Research Network, Swansea University Medical School, Swansea University, Wales, UK; and Neurology Department, Morriston Hospital, Swansea Bay University Health Board, Wales, UK.                                      |
| <b>Mark I. Rees</b>             | Faculty of Medicine & Health, University of Sydney, Sydney, Australia; Faculty of Medicine and Life Science, Swansea University, Swansea, Wales, UK                                                                                   |
| <b>Jerry J. Shih</b>            | Comprehensive Epilepsy Center, University of California San Diego, School of Medicine, La Jolla, CA, USA.                                                                                                                             |
| <b>Rani K. Singh</b>            | Carolinas Health Care System, USA.                                                                                                                                                                                                    |
| <b>Michael C. Smith</b>         | Rush University Medical Center, Rush Epilepsy Center, Chicago, IL, USA.                                                                                                                                                               |
| <b>Philip E. M. Smith</b>       | Department of Neurology, University Hospital of Wales, Heath Park, Cardiff, Wales, CF14 4XW, UK.                                                                                                                                      |
| <b>Michael R. Sperling</b>      | Jefferson Comprehensive Epilepsy Center, Department of Neurology, Sidney Kimmel Medical College at Thomas Jefferson University, USA.                                                                                                  |
| <b>Joseph Sullivan</b>          | Department of Neurology, University of California, San Francisco, San Francisco, California 94143 USA.                                                                                                                                |
| <b>Rhys H. Thomas</b>           | Translational and Clinical Research Institute, Faculty of Medical Sciences, Newcastle University, UK.                                                                                                                                 |
| <b>Gretchen K. Von Allmen</b>   | Division of Child & Adolescent Neurology, Departments of Pediatrics, University of Texas Medical School, Houston, Texas 77030 USA.                                                                                                    |
| <b>Judith Weisenberg</b>        | Department of Neurology, Washington University School of Medicine, St. Louis, Missouri 63110 USA.                                                                                                                                     |
| <b>Peter Widdess-Walsh</b>      | Department of Neurology, Beaumont Hospital, Dublin, Ireland.                                                                                                                                                                          |
| <b>Melodie R. Winawer</b>       | G. H. Sergievsky Center, Columbia University, New York, NY 10032, USA; Department of Neurology, Columbia University, New York, NY 10032, USA.                                                                                         |
| <b>Christopher J. Yuskaitis</b> | Department of Neurology, Boston Children's Hospital Harvard Medical School, Boston, Massachusetts, 02115 USA.                                                                                                                         |

**Supplementary Table 1. Summary of original samples by cohort origin and SNP array.**

| <b>Sample source</b>                              | <b>Illumina array</b> | <b>Number samples</b> | <b>Case / Control</b>        |
|---------------------------------------------------|-----------------------|-----------------------|------------------------------|
| Epi4K families                                    | HC, HME, MEGA         | 1,784 (303 families)  | Cases + unaffected relatives |
| University of Melbourne families                  | GSA                   | 223 (36 families)     | Cases + unaffected relatives |
| Epi4K singletons                                  | HC                    | 488                   | Cases                        |
| Tertiary hospital singletons (Australia, NZ, USA) | GSA                   | 2,132                 | Cases                        |
| QSkin                                             | GSA                   | 17,233                | Controls                     |

Abbreviations: GSA, Global Screening Array; HC, HumanCore; HME, Human MultiEthnic; MEGA, MultiEthnic Global Array.

**Supplementary Table 2. Demographics of final study cohorts under comparison.**

| Group                   | N      | Sex, M:F | Age <sup>a</sup> , range (median) | Country of origin <sup>b</sup>                      |
|-------------------------|--------|----------|-----------------------------------|-----------------------------------------------------|
| Familial Epilepsy Cases | 1,818  | 45%:55%  | 0–101 years (31)                  | Australia, Ireland, Israel, New Zealand, USA, Wales |
| Sporadic Epilepsy Cases | 1,182  | 50%:50%  | 0–82 years (29)                   | Australian, New Zealand, USA                        |
| Unaffected Relatives    | 771    | 44%:56%  | 18–97 years (55)                  | Australia, Ireland, Israel, New Zealand, USA, Wales |
| Controls                | 15,929 | 45%:55%  | 40–69 years (NA)                  | Australia                                           |

<sup>a</sup>Age in years at study recruitment. Extreme age ranges reflect extensive recruitment of familial relatives (affected and unaffected).

<sup>b</sup>By this stage, samples had been restricted to those of European genetic ancestry (see Methods).

**Supplementary Table 3. Detailed phenotypes of epilepsy cases.**

| <b>Epilepsy Phenotype</b>                                    | <b>N</b> | <b>Syndromes included</b>               |
|--------------------------------------------------------------|----------|-----------------------------------------|
| <b><i>Genetic Generalised Epilepsies (GGE) (n = 922)</i></b> |          |                                         |
| Absence epilepsies                                           | 206      | CAE, JAE                                |
| Juvenile myoclonic epilepsy                                  | 100      | JME                                     |
| Other GGE                                                    | 78       | GTCSA, late onset GGE                   |
| Unspecified GGE                                              | 538      |                                         |
| <b><i>Focal Epilepsies (n = 1,276)</i></b>                   |          |                                         |
| Lesional focal epilepsies                                    |          |                                         |
| - MCD                                                        | 201      | FCD, PMG, PVNH                          |
| - Benign neoplasm                                            | 47       | DNET, ganglioglioma                     |
| - Other lesional epilepsies                                  | 101      | TBI, stroke, unspecified lesional       |
| Non-lesional focal epilepsies                                |          |                                         |
| - SLFEC                                                      | 39       | BECTS, childhood occipital epilepsies   |
| - Temporal lobe epilepsy                                     | 237      |                                         |
| - Other localised                                            | 60       | Frontal, parietal, occipital epilepsies |
| Unspecified focal epilepsies                                 | 591      |                                         |
| <b><i>Other Epilepsies (n = 802)</i></b>                     |          |                                         |
| DEE                                                          |          |                                         |
| - Infantile spasms                                           | 162      |                                         |
| - Lennox-Gastaut syndrome                                    | 138      |                                         |
| - Other DEE                                                  | 174      | Dravet, MAE, CSWS                       |
| Febrile seizures-plus                                        | 57       |                                         |
| Febrile seizures alone                                       | 127      |                                         |
| Combined generalised/focal epilepsy                          | 35       |                                         |
| Unclassified epilepsy                                        | 109      |                                         |

**Abbreviations:**

BECTS, benign epilepsy of childhood with centro-temporal spikes  
CAE, childhood absence epilepsy  
CSWS, continuous spike-and-wave during sleep  
DEE, developmental and epileptic encephalopathies  
DNET, dysembryoplastic neuroectodermal tumor  
FCD, focal cortical dysplasia  
GGE, genetic generalised epilepsy  
GTCSA, generalised tonic-clonic seizures alone  
JAE, juvenile absence epilepsy  
JME, juvenile myoclonic epilepsy  
MAE, myoclonic-atonic epilepsy  
MCD, malformations of cortical development  
MFSI, migrating focal seizures of infancy  
PMG, polymicrogyria  
PVNH, periventricular nodular heterotopia  
SLFEC, self-limited focal epilepsies of childhood  
TBI, traumatic brain injury

**Supplementary Table 4. Deciles of polygenic risk.**

Decile cut-points were determined from the PRS distribution of population controls, then applied to other study cohorts with the lowest decile of the particular study cohort used as a reference. Odds ratios were derived from mixed-effects logistic regression models, accounting for family relatedness, sex and principal components of ancestry as covariates.

**a. Familial epilepsy cases**

| Decile        | N cases   | N controls | OR          | 95% CI            |
|---------------|-----------|------------|-------------|-------------------|
| 1             | 127       | 1,593      | Ref.        | n/a               |
| 2             | 155       | 1,593      | 1.22        | 0.95, 1.58        |
| 3             | 144       | 1,593      | 1.09        | 0.85, 1.42        |
| 4             | 150       | 1,593      | 1.13        | 0.88, 1.46        |
| 5             | 142       | 1,593      | 1.08        | 0.84, 1.40        |
| 6             | 182       | 1,593      | 1.44        | 1.13, 1.85        |
| 7             | 182       | 1,593      | 1.37        | 1.08, 1.76        |
| 8             | 199       | 1,593      | 1.44        | 1.13, 1.84        |
| 9             | 218       | 1,593      | 1.55        | 1.22, 1.97        |
| 10            | 319       | 1,593      | 2.06        | 1.65, 2.60        |
| <i>Top 1%</i> | <i>63</i> | <i>160</i> | <i>3.80</i> | <i>1.92, 5.69</i> |

**b. Sporadic epilepsy cases**

| Decile        | N cases   | N controls | OR          | 95% CI            |
|---------------|-----------|------------|-------------|-------------------|
| 1             | 95        | 1,593      | Ref.        | n/a               |
| 2             | 112       | 1,593      | 1.14        | 0.85, 1.53        |
| 3             | 98        | 1,593      | 0.97        | 0.71, 1.31        |
| 4             | 98        | 1,593      | 0.97        | 0.72, 1.32        |
| 5             | 105       | 1,593      | 0.99        | 0.74, 1.34        |
| 6             | 137       | 1,593      | 1.35        | 1.02, 1.80        |
| 7             | 126       | 1,593      | 1.21        | 0.91, 1.62        |
| 8             | 125       | 1,593      | 1.10        | 0.82, 1.48        |
| 9             | 117       | 1,593      | 1.02        | 0.76, 1.37        |
| 10            | 169       | 1,593      | 1.41        | 1.07, 1.86        |
| <i>Top 1%</i> | <i>23</i> | <i>160</i> | <i>1.80</i> | <i>1.03, 3.12</i> |

**c. Unaffected relatives of familial epilepsy cases**

| Decile        | N relatives | N controls | OR          | 95% CI            |
|---------------|-------------|------------|-------------|-------------------|
| 1             | 58          | 1,593      | Ref.        | n/a               |
| 2             | 74          | 1,593      | 1.24        | 0.87, 1.78        |
| 3             | 80          | 1,593      | 1.38        | 0.96, 1.97        |
| 4             | 80          | 1,593      | 1.33        | 0.94, 1.91        |
| 5             | 78          | 1,593      | 1.31        | 0.93, 1.87        |
| 6             | 72          | 1,593      | 1.21        | 0.85, 1.74        |
| 7             | 65          | 1,593      | 1.14        | 0.79, 1.63        |
| 8             | 69          | 1,593      | 1.07        | 0.75, 1.55        |
| 9             | 84          | 1,593      | 1.30        | 0.92, 1.85        |
| 10            | 111         | 1,593      | 1.62        | 1.16, 2.27        |
| <i>Top 1%</i> | <i>20</i>   | <i>160</i> | <i>1.95</i> | <i>0.98, 3.91</i> |

**Supplementary Table 5. Varying model thresholds.**

We repeated the primary analysis, comparing familial cases (n = 1,818) to population controls (n = 15,929) using a range of thresholds to determine which variants to include in the polygenic risk score model. P-values were adjusted for multiple comparisons (FDR < 0.05).

| Threshold           | SNPs included | OR (95% CI)       | $p_{\text{adj}}$   |
|---------------------|---------------|-------------------|--------------------|
| <0.5                | 59,138        | 1.20 (1.13, 1.27) | $5 \times 10^{-9}$ |
| <0.1                | 23,722        | 1.20 (1.13, 1.27) | $4 \times 10^{-9}$ |
| <0.05               | 14,837        | 1.19 (1.12, 1.26) | $1 \times 10^{-8}$ |
| <0.01               | 5,189         | 1.17 (1.10, 1.24) | $4 \times 10^{-7}$ |
| $<1 \times 10^{-5}$ | 44            | 1.07 (1.02, 1.13) | 0.03               |
| $<1 \times 10^{-7}$ | 6             | 1.08 (1.02, 1.14) | 0.02               |



**Supplementary Table 6. Negative control, Asthma PRS.**

| <b>Group</b>            | <b>Asthma PRS,<br/>Mean (SD)</b> | <b>OR</b> | <b>95% CI</b> | <b>p-value</b> |
|-------------------------|----------------------------------|-----------|---------------|----------------|
| Controls                | 0.00 (1.00)                      | Ref.      | n/a           | n/a            |
| Familial Epilepsy Cases | 0.03 (0.99)                      | 0.96      | 0.91, 1.01    | 0.14           |
| Sporadic Epilepsy Cases | 0.01 (1.00)                      | 1.04      | 0.97, 1.10    | 0.23           |
| Unaffected Relatives    | 0.02 (1.05)                      | 0.97      | 0.89, 1.06    | 0.54           |

OR = Odds ratio of being in the specified case group, compared to being in the control group, for every one unit (standard deviation) increase in Asthma PRS, after adjusting for ancestry, sex, and family relatedness.

## Supplementary Table 7. PRS Models stratified by epilepsy phenotype.

### a. Epilepsy-PRS Model

| Group           | N      | PRS mean (95% CI) | OR (95% CI) <sup>a</sup> | <i>p</i> <sub>adj</sub> |
|-----------------|--------|-------------------|--------------------------|-------------------------|
| Controls        | 15,929 | 0                 | Ref                      | n/a                     |
| GGE, Familial   | 678    | 0.42 (0.34, 0.50) | 1.33 (1.22, 1.44)        | 7 x 10 <sup>-10</sup>   |
| GGE, Sporadic   | 244    | 0.33 (0.20, 0.46) | 1.27 (1.12, 1.44)        | 9 x 10 <sup>-4</sup>    |
| Focal, Familial | 601    | 0.17 (0.08, 0.26) | 1.11 (1.02, 1.21)        | 0.03                    |
| Focal, Sporadic | 675    | 0.10 (0.02, 0.18) | 1.02 (0.95, 1.11)        | 0.63                    |
| Other, Familial | 539    | 0.23 (0.14, 0.31) | 1.15 (1.05, 1.26)        | 0.005                   |
| Other, Sporadic | 263    | 0.14 (0.07, 0.22) | 1.07 (0.95, 1.21)        | 0.36                    |

### b. GGE-PRS Model

| Group           | N      | PRS mean (95% CI) | OR (95% CI) <sup>a</sup> | <i>p</i> <sub>adj</sub> |
|-----------------|--------|-------------------|--------------------------|-------------------------|
| Controls        | 15,929 | 0                 | Ref                      | n/a                     |
| GGE, Familial   | 678    | 0.60 (0.51, 0.70) | 1.58 (1.45, 1.72)        | 6 x 10 <sup>-25</sup>   |
| GGE, Sporadic   | 244    | 0.47 (0.34, 0.60) | 1.46 (1.28, 1.65)        | 5 x 10 <sup>-8</sup>    |
| Focal, Familial | 601    | 0.11 (0.02, 0.19) | 1.05 (0.96, 1.14)        | 0.36                    |
| Focal, Sporadic | 675    | 0.13 (0.05, 0.20) | 1.04 (0.96, 1.12)        | 0.42                    |
| Other, Familial | 539    | 0.27 (0.18, 0.36) | 1.25 (1.14, 1.37)        | 4 x 10 <sup>-6</sup>    |
| Other, Sporadic | 263    | 0.22 (0.11, 0.33) | 1.12 (0.99, 1.27)        | 0.13                    |

### c. FE-PRS Model

| Group           | N      | PRS mean (95% CI)  | OR (95% CI) <sup>a</sup> | <i>p</i> <sub>adj</sub> |
|-----------------|--------|--------------------|--------------------------|-------------------------|
| Controls        | 15,929 | 0.00 (-0.02, 0.02) | Ref.                     | n/a                     |
| GGE, Familial   | 678    | 0.17 (0.09, 0.25)  | 1.05 (0.96, 1.14)        | 0.37                    |
| GGE, Sporadic   | 244    | 0.12 (-0.01, 0.26) | 1.04 (0.91, 1.18)        | 0.66                    |
| Focal, Familial | 601    | 0.15 (0.07, 0.23)  | 1.09 (1.00, 1.18)        | 0.11                    |
| Focal, Sporadic | 675    | 0.09 (0.01, 0.17)  | 1.02 (0.94, 1.10)        | 0.76                    |
| Other, Familial | 539    | 0.12 (0.03, 0.20)  | 1.04 (0.95, 1.14)        | 0.42                    |
| Other, Sporadic | 263    | 0.05 (-0.08, 0.17) | 0.99 (0.88, 1.12)        | 0.91                    |

<sup>a</sup>Odds ratios are for the comparison to population controls, adjusted for sex, five ancestry principal components, and genetic relatedness within families. P-values were adjusted for multiple comparisons (FDR < 0.05).

**Supplementary Table 8. Epilepsy types among rare variant carriers, familial cases.**

| <b>Epilepsy Type</b>    | <b>RV positive</b> | <b>RV negative</b> |
|-------------------------|--------------------|--------------------|
| GGE                     | 20                 | 658                |
| Focal                   | 31                 | 570                |
| Other                   |                    |                    |
| - DEE                   | 51                 | 169                |
| - Febrile seizures-plus | 32                 | 147                |
| - Combined              | 0                  | 32                 |
| - Unclassified          | 6                  | 102                |
| <b>Total</b>            | <b>140</b>         | <b>1,678</b>       |

Abbreviations: GGE, genetic generalised epilepsies; DEE, developmental and epileptic encephalopathy; RV, rare variant (pathogenic single nucleotide variant or recurrent epilepsy-associated microdeletion).

## Supplementary Table 9. PRS in cases carrying rare epilepsy variants.

### a. Familial cases

Polygenic risk scores in individuals with familial epilepsy who were positive for rare variants (n = 140) versus individuals negative for rare variants (n = 1,678). P-values adjusted for multiple comparisons (FDR < 0.05) were not significant.

| PRS Model        | OR   | 95% CI     | <i>P</i> <sub>adj</sub> |
|------------------|------|------------|-------------------------|
| All-Epilepsy-PRS | 0.90 | 0.74, 1.10 | 0.37                    |
| GGE-PRS          | 0.91 | 0.74, 1.11 | 0.40                    |
| FE-PRS           | 0.86 | 0.71, 1.03 | 0.21                    |

OR = odds ratio of being in the rare variant-positive group, compared to being in the rare variant-negative group, for every one unit (standard deviation) increase in PRS, after adjusting for ancestry, sex, and family relatedness.

### b. Sporadic cases

Polygenic risk scores in individuals with sporadic epilepsy who were positive for rare variants (n = 48) versus individuals negative for rare variants (n = 1,134). P-values adjusted for multiple comparisons (FDR < 0.05) were not significant.

| PRS Model        | OR   | 95% CI     | <i>P</i> <sub>adj</sub> |
|------------------|------|------------|-------------------------|
| All-Epilepsy-PRS | 0.98 | 0.73, 1.31 | 0.91                    |
| GGE-PRS          | 0.77 | 0.58, 1.07 | 0.13                    |
| FE-PRS           | 1.00 | 0.74, 1.35 | 0.98                    |

OR = odds ratio of being in the rare variant-positive group, compared to being in the rare variant-negative group, for every one unit (standard deviation) increase in PRS, after adjusting for ancestry and sex.

**Supplementary Figure 1. SNP concordance across four Illumina array types.**

The four arrays genotyped 127,998 SNPs in common, with greatest concordance (98.2%) between the two arrays with the most SNPs, HME and MEGA.

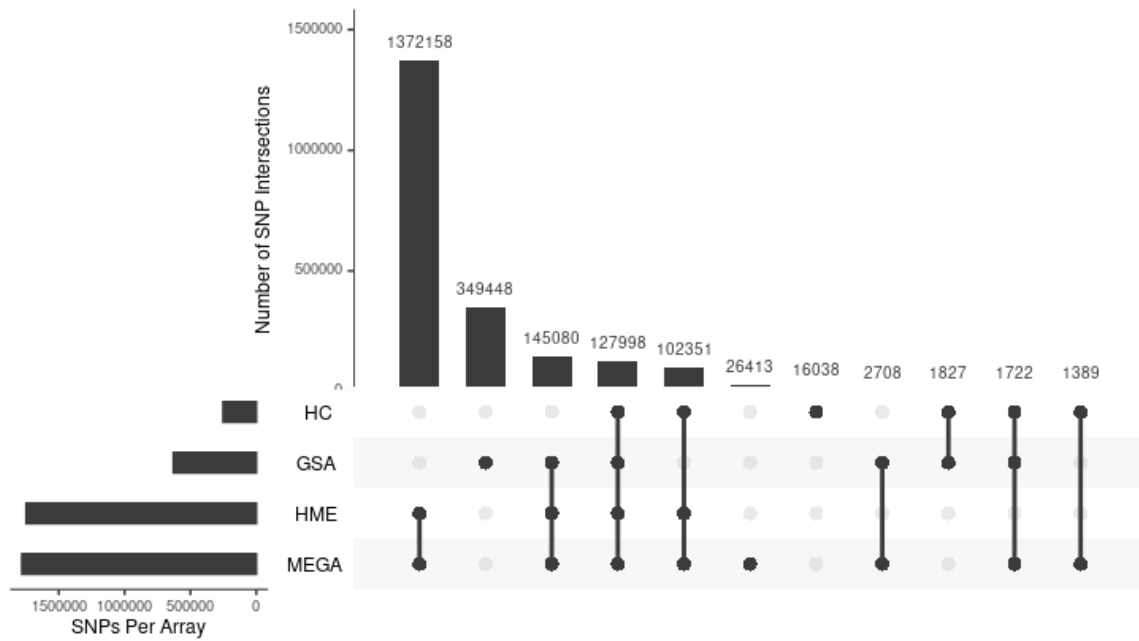

HC: HumanCore (n=251,325 SNPs); GSA: Global Screening Array (n=628,783 SNPs); HME: Human Multi-Ethnic (n=1,747,587 SNPs); MEGA: Multi- Ethnic Global Array (n=1,779,819 SNPs).

**Supplementary Figure 2. Quality control and SNP imputation workflow.**

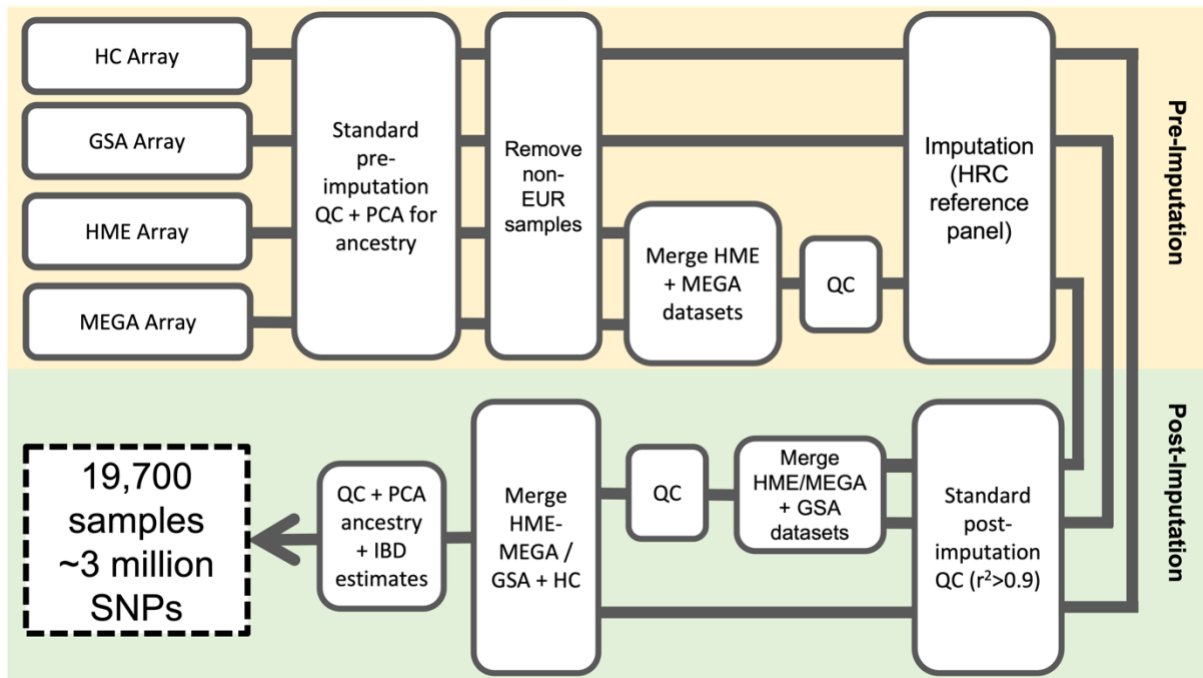

Abbreviations: HC, HumanCore; GSA, Global Screening Array; HME, Human Multi-Ethnic; MEGA, Multi-Ethnic Global Array; QC, quality control; PCA, principal components analysis; EUR, European; HRC, haplotype reference consortium; IBD, identity-by-descent.

**Supplementary Figure 3. Ancestry principal components plot for our Case:Control cohort against 1000 Genomes.**

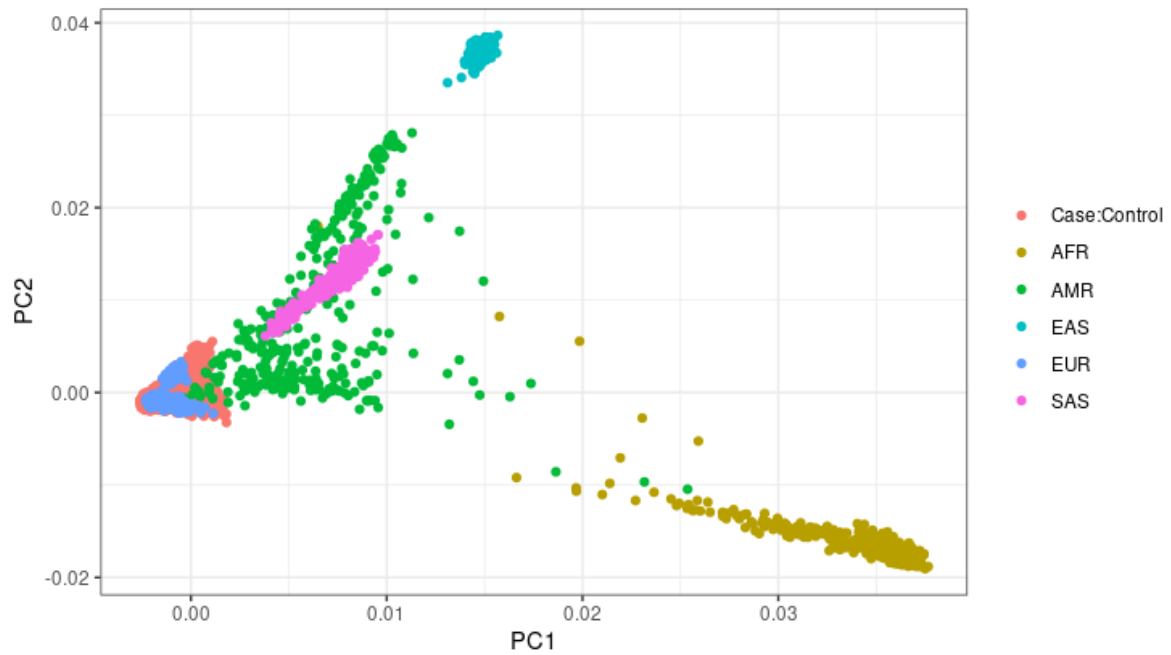

Cases include unaffected relatives.

Abbreviations: PC, principal component; AFR, African; AMR, Admixed; EAS, East Asian; EUR, European; SAS, South Asian.

**Supplementary Figure 4. Reason for sample exclusions stratified by Case:Control status.**

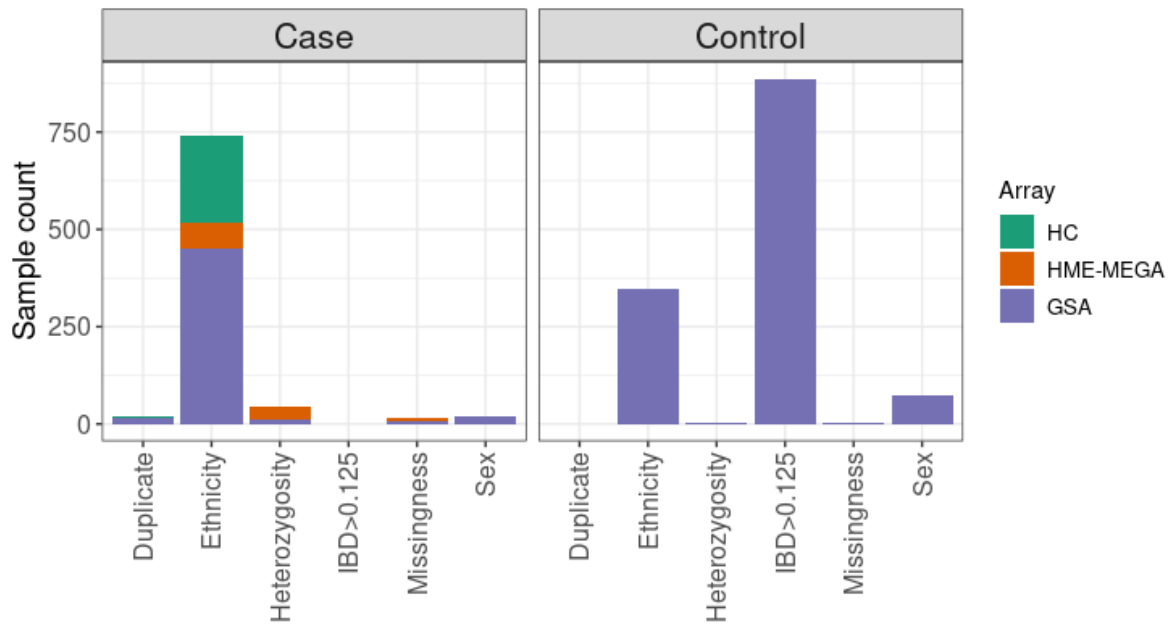

Cases include unaffected relatives.

Abbreviations: HC, HumanCore; GSA, Global Screening Array; HME, Human Multi-Ethnic; MEGA, Multi-Ethnic Global Array; IBD, identity-by-descent estimates.



**Supplementary Figure 5. Distribution of affected individuals genotyped per family.**

Families of size 1 (n = 2,092) include sporadic cases with no family history of epilepsy (n = 1,182) as well as familial cases where only one affected relative was genotyped (n = 910). An additional 908 familial cases came from 270 families in which two or more affected individuals were genotyped.

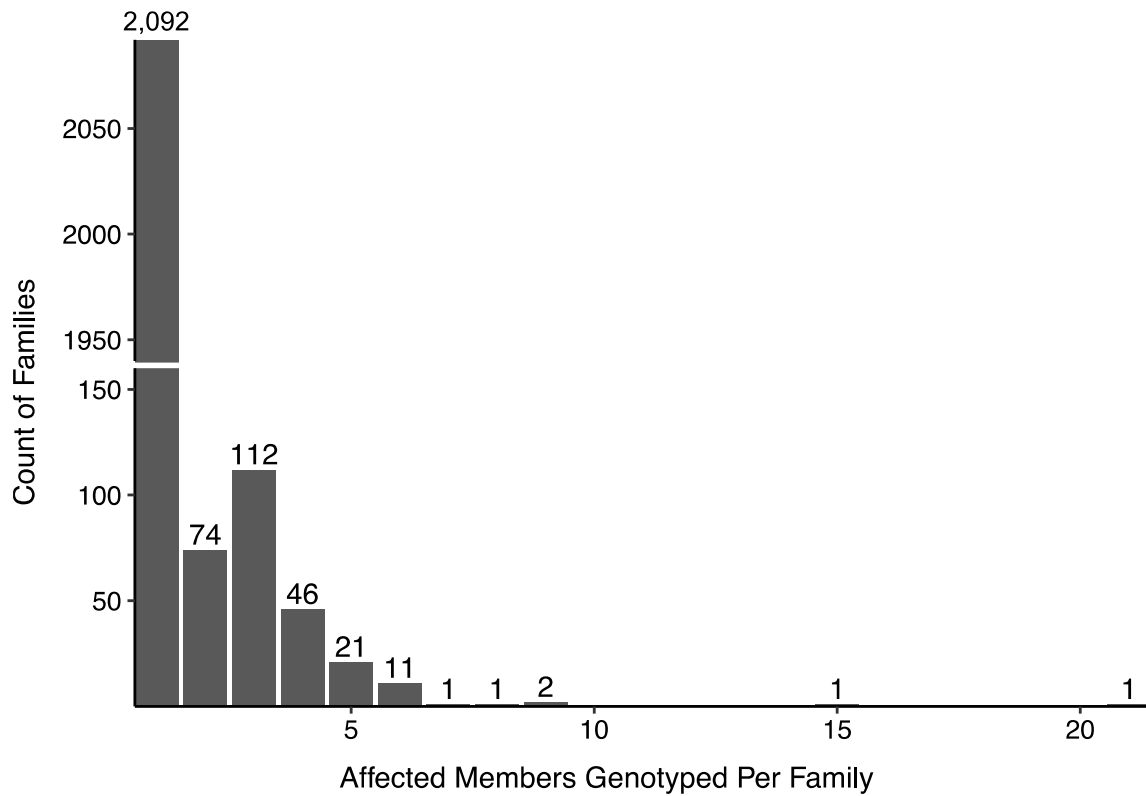

### Supplementary Figure 6. Epilepsy PRS in multiplex families.

Familial epilepsy cases were further stratified into multiplex families (three or more affected per family) versus the remaining families with only two affected per family or a positive family history with unknown number of affected relatives.

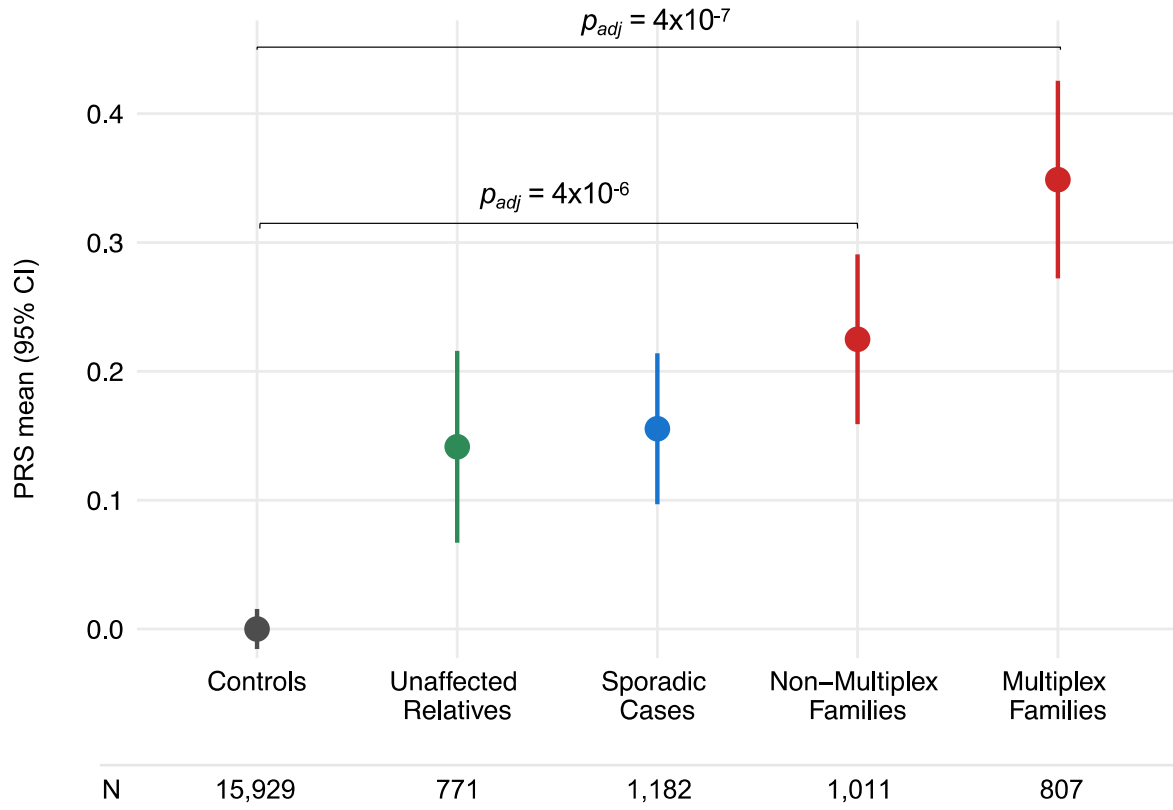

**Supplementary Figure 7. PRS in sporadic cases carrying rare variants.**

Polygenic risk scores in individuals with sporadic epilepsy who were positive for rare variants (n = 48) versus individuals negative for rare variants (n = 1,134). Statistical comparisons were non-significant ( $P_{adj} > 0.05$ ); see Supplementary Table 9b.

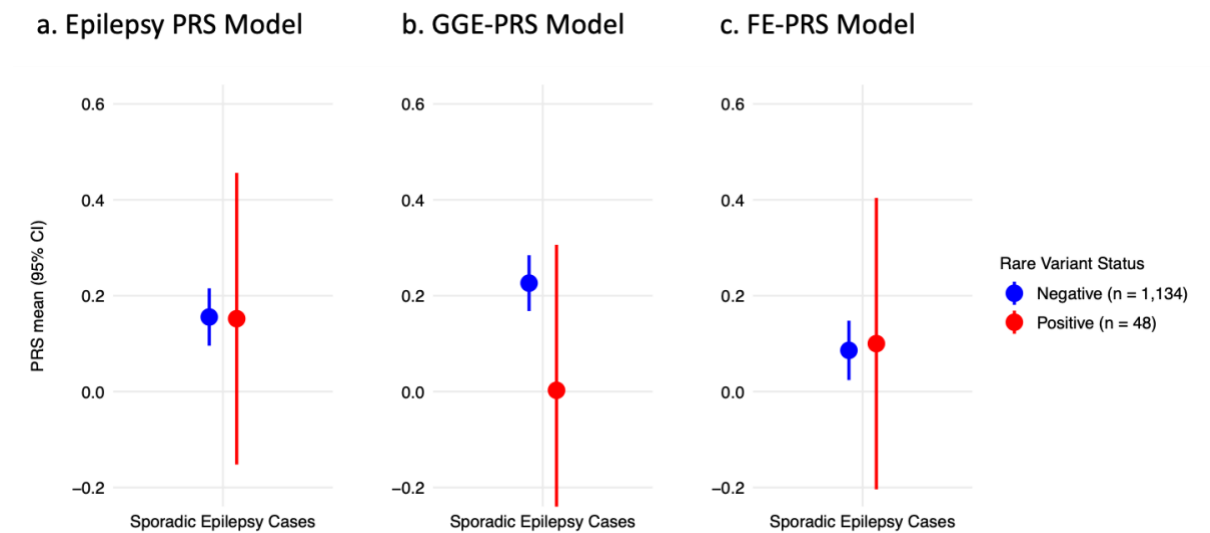

Supplement: mmc2.pdf [file mmc2.pdf]
